# Supplementary material for: Microemulsion Derived Titania Nanospheres: An Improved Pt Supported Catalyst for Glycerol Aqueous Phase Reforming
Source: MDPI journal article supplement (doi:10.3390/nano11051175), 2021-04-29
Supplement: s1 [file s1]

## Supplementary Materials

# Microemulsion Derived Titania Nanospheres: An Improved Pt Supported Catalyst for Glycerol Aqueous Phase Reforming

Andrea Fasolini, Erica Lombardi, Tommaso Tabanelli and Francesco Basile \*

Dipartimento di Chimica Industriale "Toso Montanari", Alma Mater Studiorum-Università di Bologna, Viale del Risorgimento 4, 40136 Bologna, Italy; andrea.fasolini2@unibo.it (A.F.); erica.lombardi3@gmail.com (E.L.); tommaso.tabanelli@unibo.it (T.T.)

\* Correspondence: f.basile@unibo.it; Tel.: +39-051-2093663

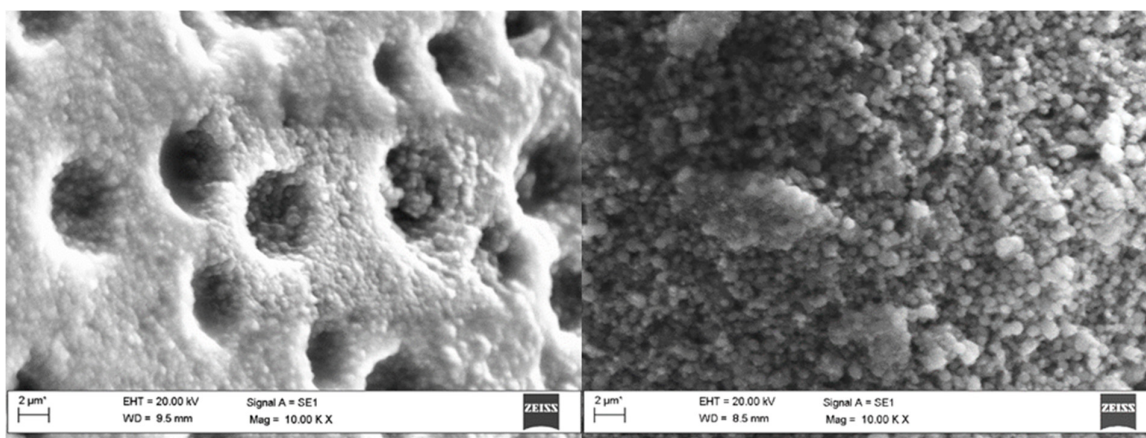

**Figure S1.** Scanning electron microscopy (SEM) images of the sponge-like solid deposited on the bottom of the flask soon after the synthesis.

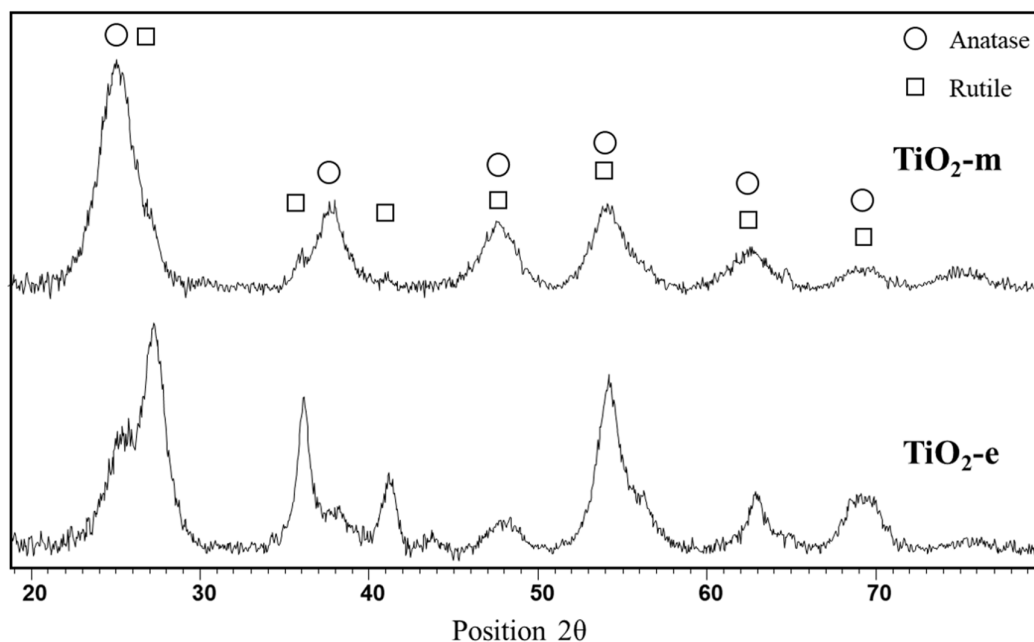

**Figure S2.** X-ray diffraction (XRD) analysis of  $\text{TiO}_2$  samples synthesized with ( $\text{TiO}_2\text{-m}$ ) and without ( $\text{TiO}_2\text{-e}$ ) the presence of a surfactant and co-surfactant.

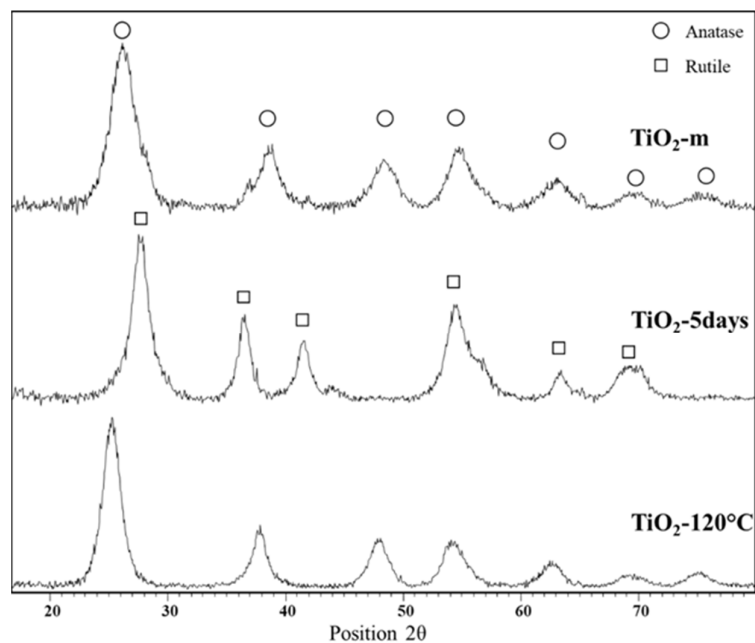

**Figure S3.** XRD analyses of TiO<sub>2</sub> samples synthesized with different synthetic methods (see Table 1).

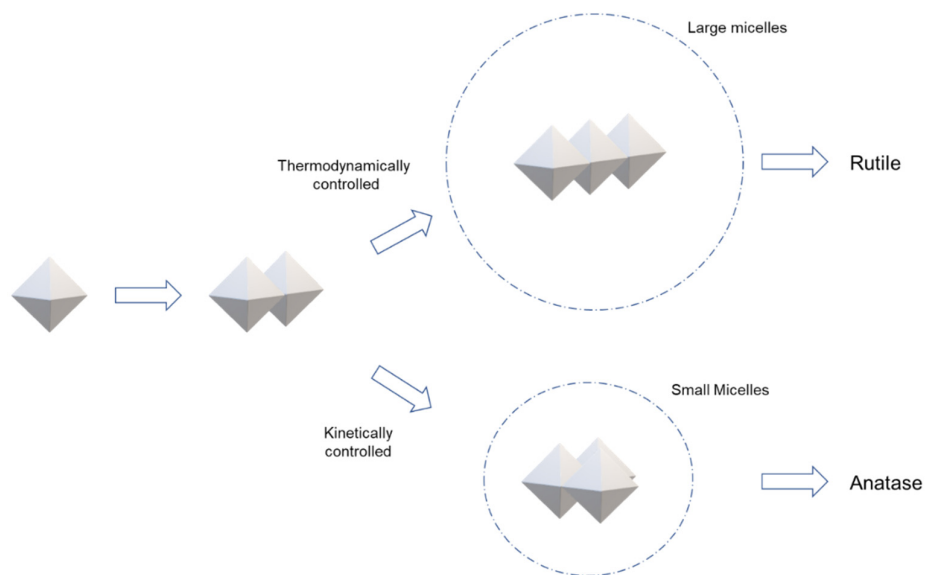

**Figure S4.** Schematic representation of the kinetically controlled and thermodynamically controlled crystal growth leading to anatase or rutile; each octahedra represent a TiO<sub>6</sub><sup>2-</sup> anion.

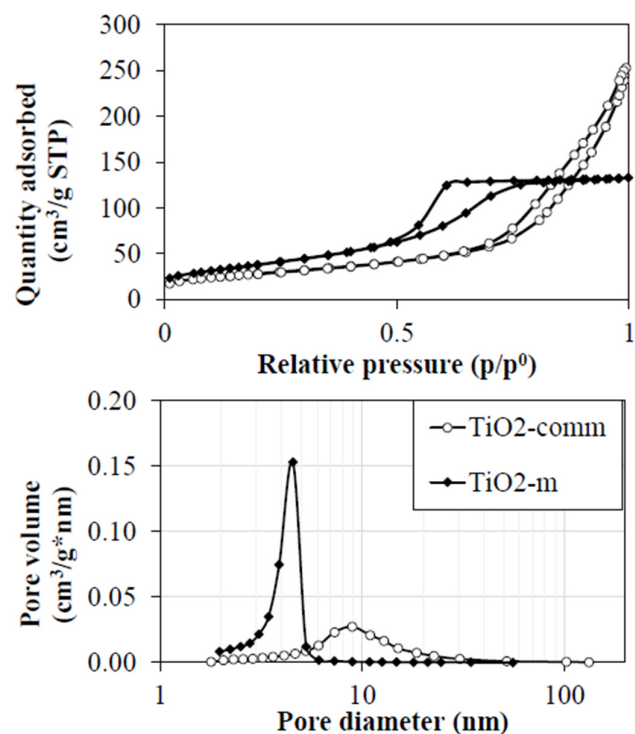

**Figure S5.** Adsorption/desorption isotherms and pore distribution of the TiO<sub>2</sub> samples.

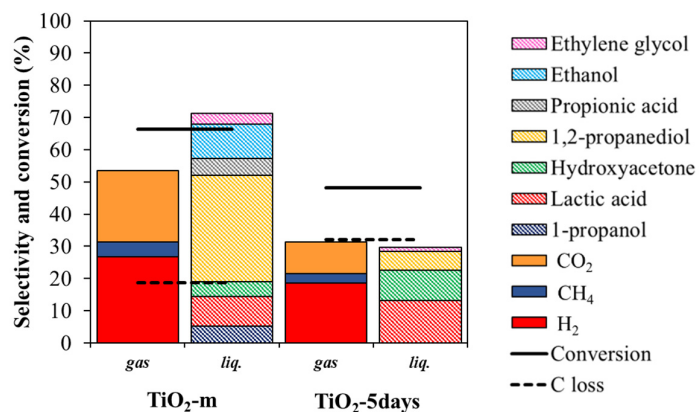

**Figure S6.** Comparison of glycerol aqueous phase reforming (APR) reactivity within Pt 3 wt% on TiO<sub>2</sub>-m400 and Pt 3 wt% on TiO<sub>2</sub>-5days400. Reaction performed at 225 °C for 3 h; glycerol loading 6 wt%.

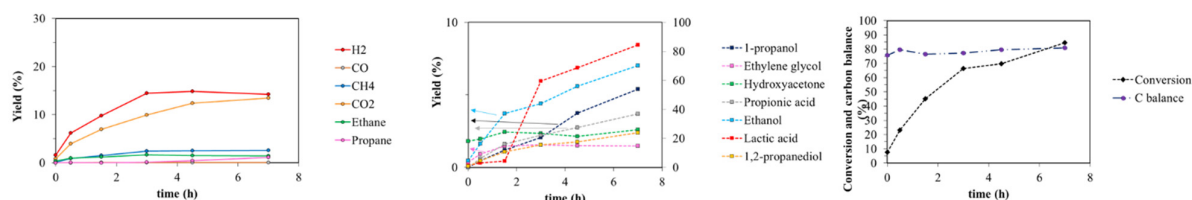

**Figure S7.** Liquid phase (centre), gas phase (left) products yields and conversion and carbon loss (right). Reactions performed at 225 °C over 3 wt% Pt/TiO<sub>2</sub>-m400 catalyst; 6 wt% glycerol loading in water.

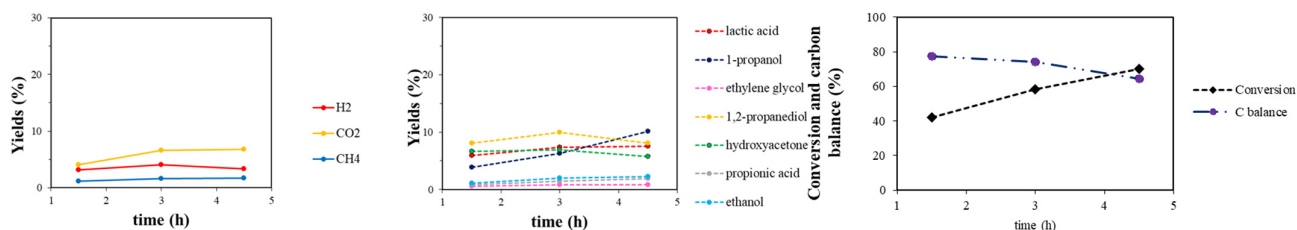

**Figure S8.** Liquid phase (centre), gas phase (left) products yields and conversion and carbon loss (right). Reactions performed at 250 °C over 1 wt% Pt/TiO<sub>2</sub>-m400 catalyst; 17 wt% glycerol loading in water.

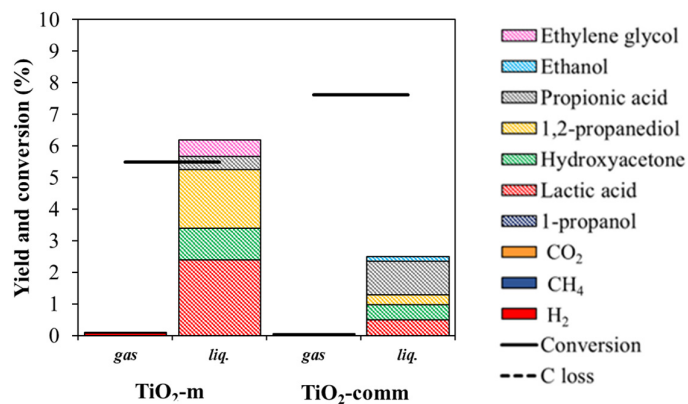

**Figure S9.** Comparison within TiO<sub>2</sub>-m and commercial supports without Pt impregnation. Reaction performed at 250 °C for 3 h; glycerol loading 17 wt%.

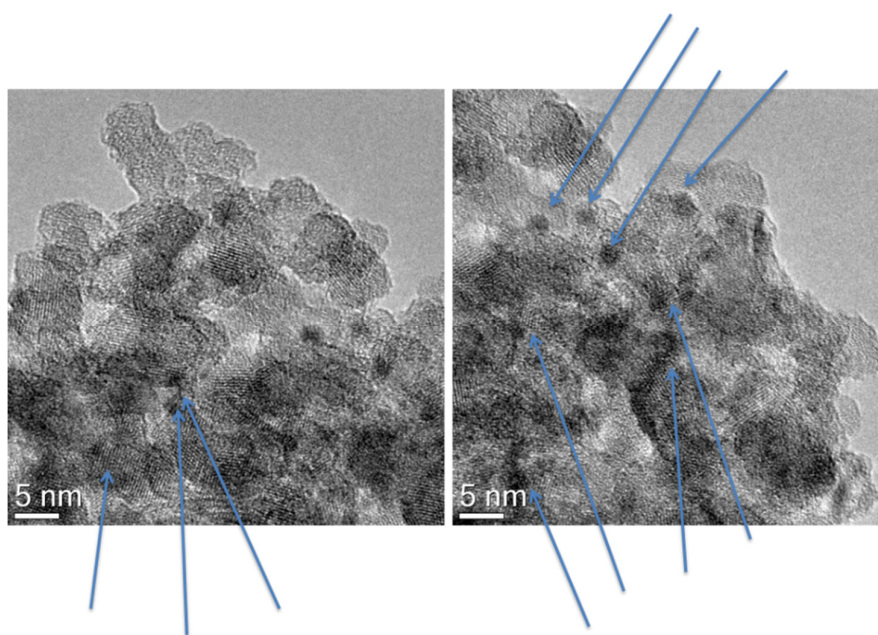

**Figure S10.** TEM analysis of Pt 3% wt on TiO<sub>2</sub>-m400 after the aqueous phase reforming reaction performed at 225 °C for 3 h; 6 wt% glycerol loading in water. Arrows indicate Pt nanoparticles.

**Table S1.** Results of reactivity tests with intermediates in terms of conversion and product selectivity. Reactions performed at 225 °C for 3 h over 3 wt% Pt/TiO<sub>2</sub>-m400 in water; 3 wt% loading of reagent in water, 0.45 g of catalyst. Inner circle reports conversion (%), outer circle reports selectivities (%).

| Reagent       | P (H <sub>2</sub> ) bar | Conv | CO <sub>2</sub> | CH <sub>4</sub> | LA | PrOH | 1,2-PDO | HA | PA | EtOH |
|---------------|-------------------------|------|-----------------|-----------------|----|------|---------|----|----|------|
| LA            | 3                       | 19   | 11              | 4               | -  | 2    | 9       | 0  | 61 | 12   |
| HA            | 3                       | 96   | 11              | 4               | 1  | 4    | 33      | -  | 2  | 9    |
| EG            | 3                       | 46   | 23              | 2               | 0  | 0    | 0       | 0  | 0  | 22   |
| Pyruvaldehyde | -                       | 100  | 5               | 1               | 72 | 0    | 9       | 8  | 8  | 4    |
| Pyruvaldehyde | 3                       | 100  | 5               | 1               | 56 | 0    | 23      | 5  | 6  | 0    |

**Table S2.** Glycerol conversion, hydrogen selectivity and liquid product selectivity for some Pt based catalysts reported in literature. \* Results reported as hydrogen yield.

| Catalyst                                                              | T (°C) | Time (h) | Process   | Conv. (%) | Sel. H <sub>2</sub> | Sel. 1,2-PDO | Sel. LA | Sel. HA | Sel. EG | Sel. PrOH | Sel. PA | Sel. EtOH | Ref. |
|-----------------------------------------------------------------------|--------|----------|-----------|-----------|---------------------|--------------|---------|---------|---------|-----------|---------|-----------|------|
| Pt/TiO <sub>2</sub>                                                   | 225    | /        | Fixed Bed | 27        | 56*                 | n.a.         | n.a.    | n.a.    | n.a.    | n.a.      | n.a.    | n.a.      | [1]  |
| Pt/TiO <sub>2</sub>                                                   | 210    | 6        | Batch     | 46        | 17*                 | 49           | n.a.    | n.a.    | 12      | 2         | n.a.    | 10        | [2]  |
| Pt/Al <sub>2</sub> O <sub>3</sub>                                     | 250    | /        | Fixed bed | 43        | 85                  | n.a.         | n.a.    | n.a.    | n.a.    | n.a.      | n.a.    | n.a.      | [3]  |
| Pt/MgO                                                                | 225    | /        | Fixed bed | n.a.      | 28                  | n.a.         | n.a.    | n.a.    | n.a.    | n.a.      | n.a.    | n.a.      | [1]  |
| Ru/Al <sub>2</sub> O <sub>3</sub> + Pt/Al <sub>2</sub> O <sub>3</sub> | 220    | 6        | Batch     | 50        | n.a.                | 47           | 2       | n.a.    | 6       | n.a.      | n.a.    | 1         | [4]  |
| Pt-Ir-ReO <sub>x</sub> /SiO <sub>2</sub>                              | 190    | 17       | Batch     | 30        | n.a.                | 19           | n.a.    | n.a.    | 1       | 4         | 2       | 2         | [5]  |
| Pt/Al <sub>2</sub> O <sub>3</sub>                                     | 210    | 6        | Batch     | 10        | 31*                 | 21           | n.a.    | n.a.    | 32      | n.a.      | n.a.    | 6         | [2]  |

## References

- Guo, Y.; Azmat, M.U.; Liu, X.; Wang, Y.; Lu, G. Effect of Support's Basic Properties on Hydrogen Production in Aqueous-Phase Reforming of Glycerol and Correlation between WGS and APR. *Appl. Energy* **2012**, *92*, 218–223, doi:10.1016/j.apenergy.2011.10.020.
- Delgado, S.N.; Yap, D.; Vivier, L.; Especel, C. Influence of the Nature of the Support on the Catalytic Properties of Pt-Based Catalysts for Hydrogenolysis of Glycerol. *J. Mol. Catal. Chem.* **2013**, *367*, 89–98, doi:10.1016/j.molcata.2012.11.001.
- Lehnert, K.; Claus, P. Influence of Pt Particle Size and Support Type on the Aqueous-Phase Reforming of Glycerol. *Catal. Commun.* **2008**, *9*, 2543–2546, doi:10.1016/j.catcom.2008.07.002.
- Roy, D.; Subramaniam, B.; Chaudhari, R.V. Aqueous Phase Hydrogenolysis of Glycerol to 1,2-Propanediol without External Hydrogen Addition. *Catal. Today* **2010**, *156*, 31–37, doi:10.1016/j.cattod.2010.01.007.
- Liu, S.; Tamura, M.; Shen, Z.; Zhang, Y.; Nakagawa, Y.; Tomishige, K. Hydrogenolysis of Glycerol with In-Situ Produced H<sub>2</sub> by Aqueous-Phase Reforming of Glycerol Using Pt-Modified Ir-ReO<sub>x</sub>/SiO<sub>2</sub> Catalyst. *Catal. Today* **2018**, *303*, 106–116, doi:10.1016/j.cattod.2017.07.025.
